# Supplementary material for: Exposure to Obesogenic Environments during Perinatal Development Modulates Offspring Energy Balance Pathways in Adipose Tissue and Liver of Rodent Models
Source: MDPI journal article supplement (doi:10.3390/nu15051281), 2023-03-04
Supplement: s1 [file s1]

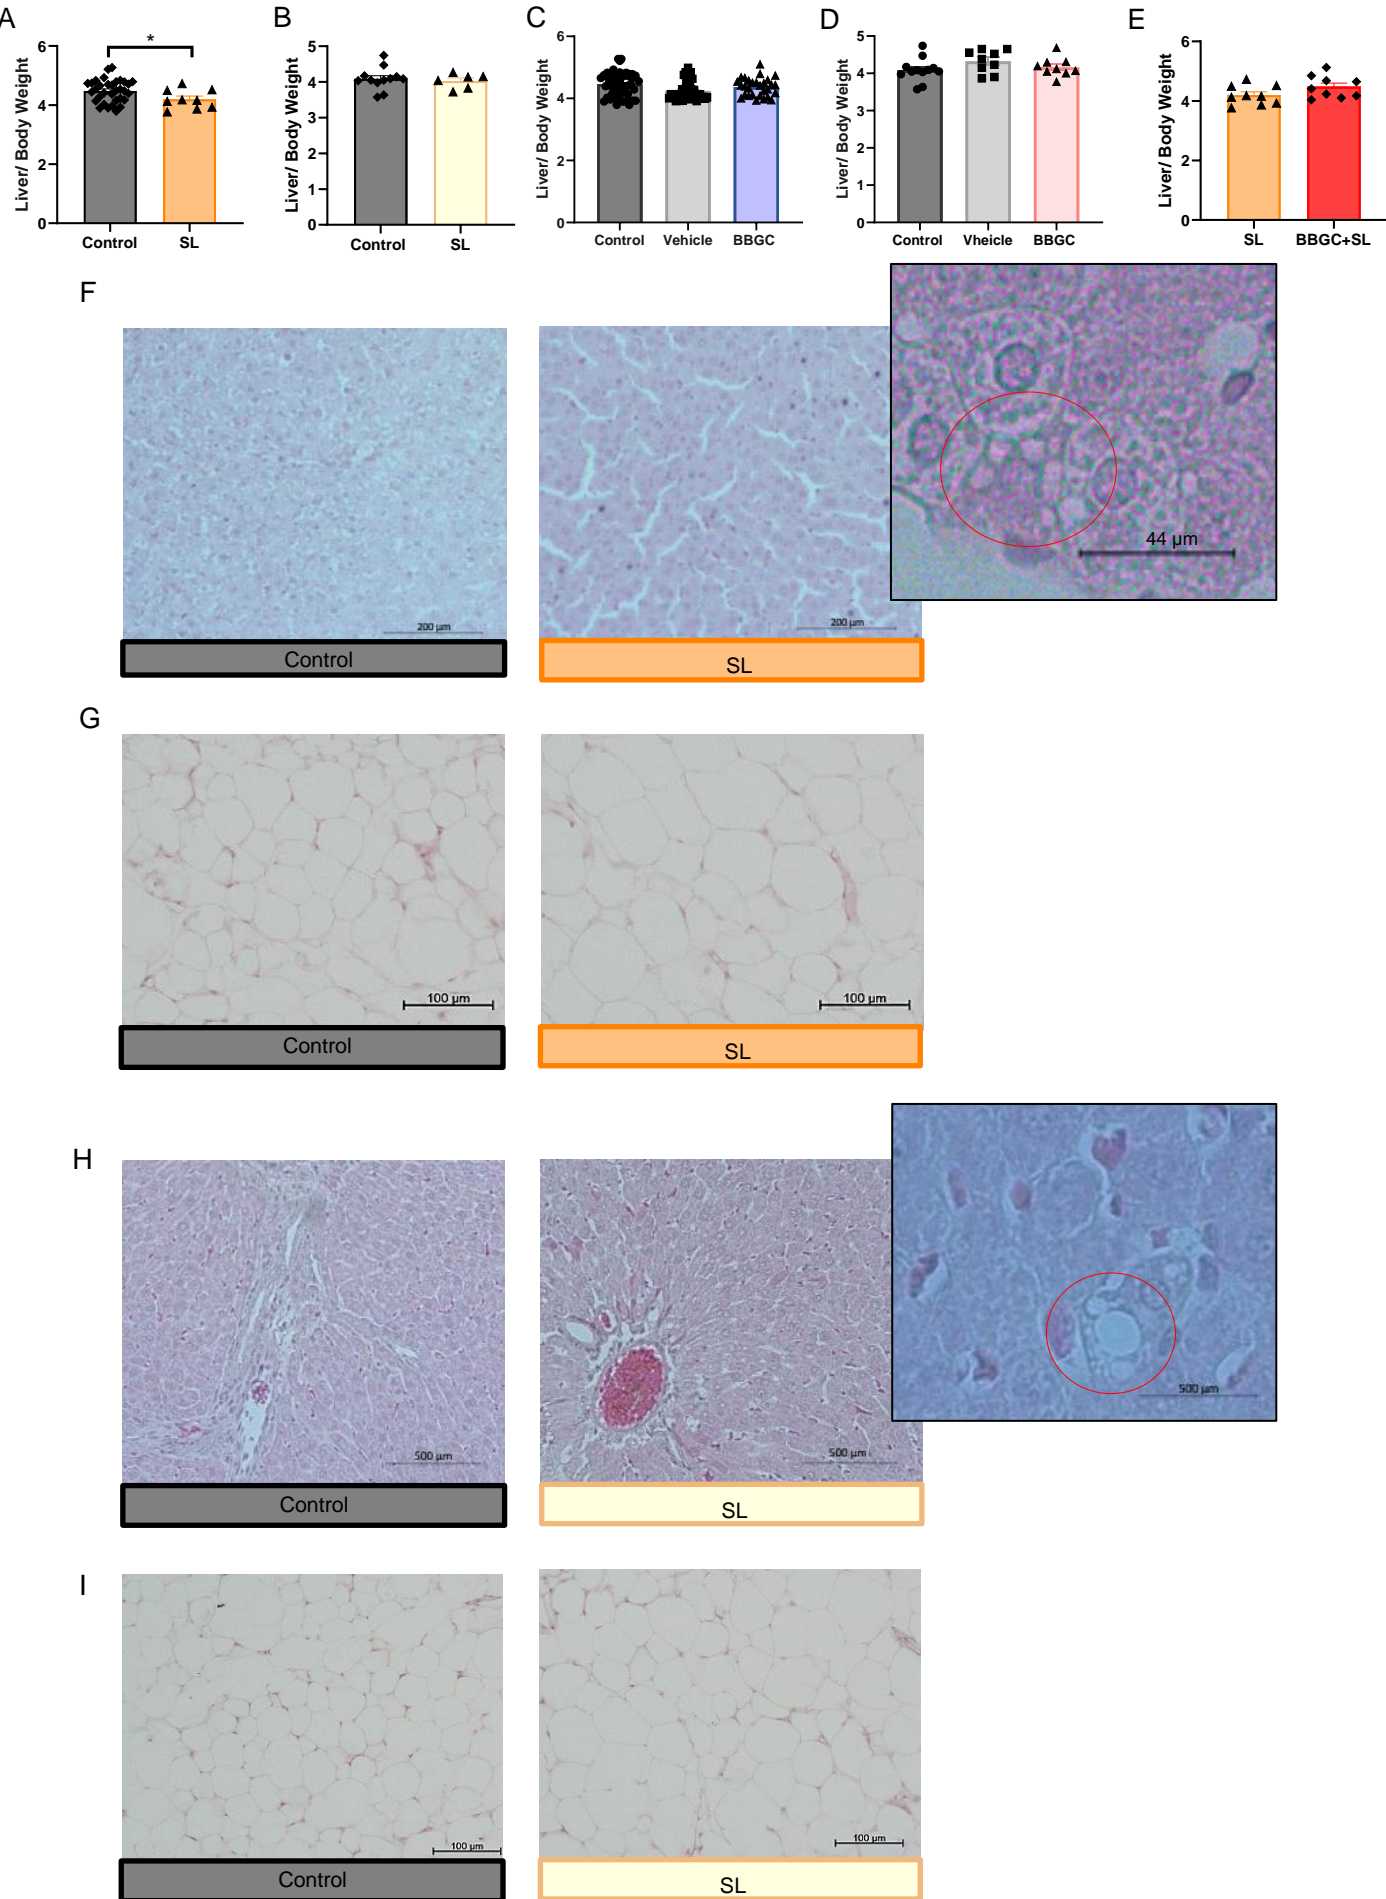

Figure S1 - The liver mass per body weight at PND 45: Male control and SL (A), female control and SL (B), male control, vehicle and BBGC (C), female control, vehicle and BBGC (D) and male SL and BBGC + SL (E). Representative images of the liver and VAT stained with Haematoxylin-eosin (100 x) – liver and VAT from male SL (F and G, respectively) and liver and VAT from female SL (H and I, respectively).

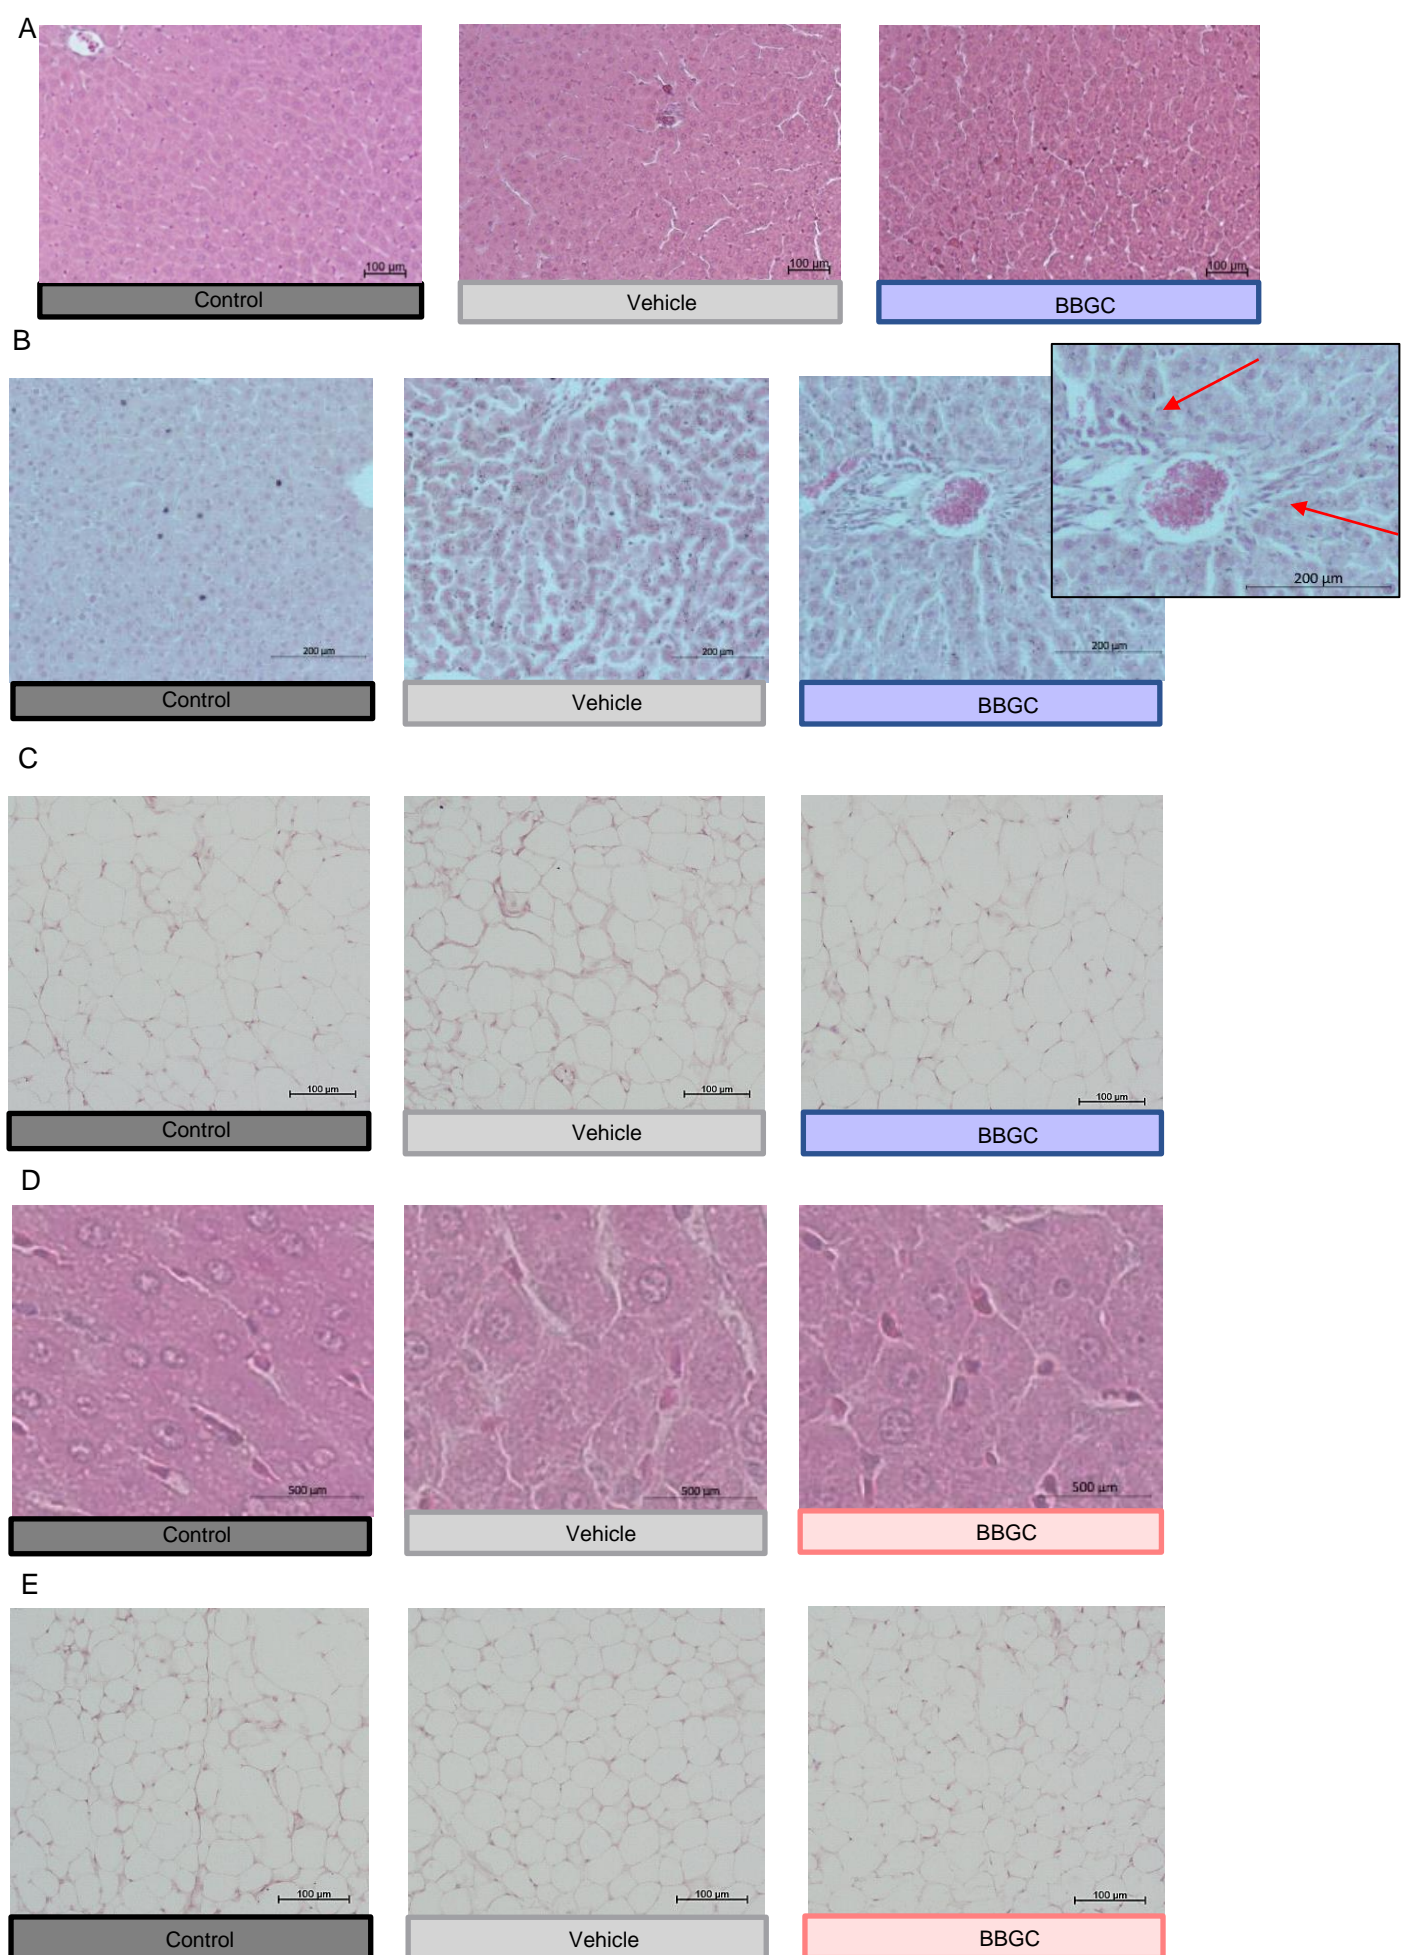

Figure S2 - Representative images of the liver and VAT stained with Haematoxylin-eosin (100 x) – liver from dams treated with BBGC (A); liver and VAT from male BBGC (B and C, respectively) and liver and VAT from female BBGC (D and E, respectively).



A

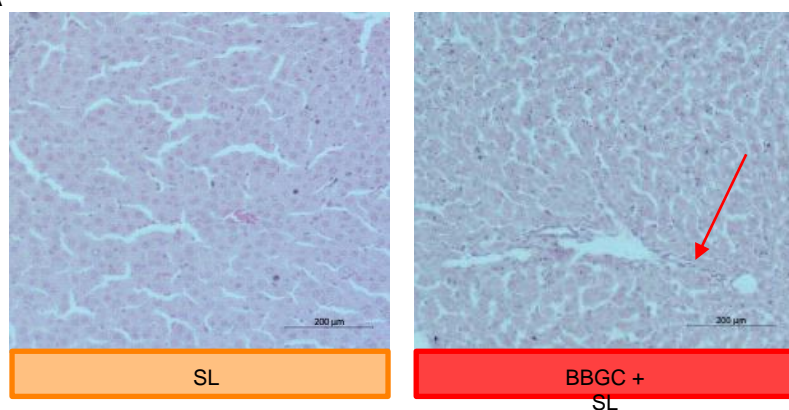

B

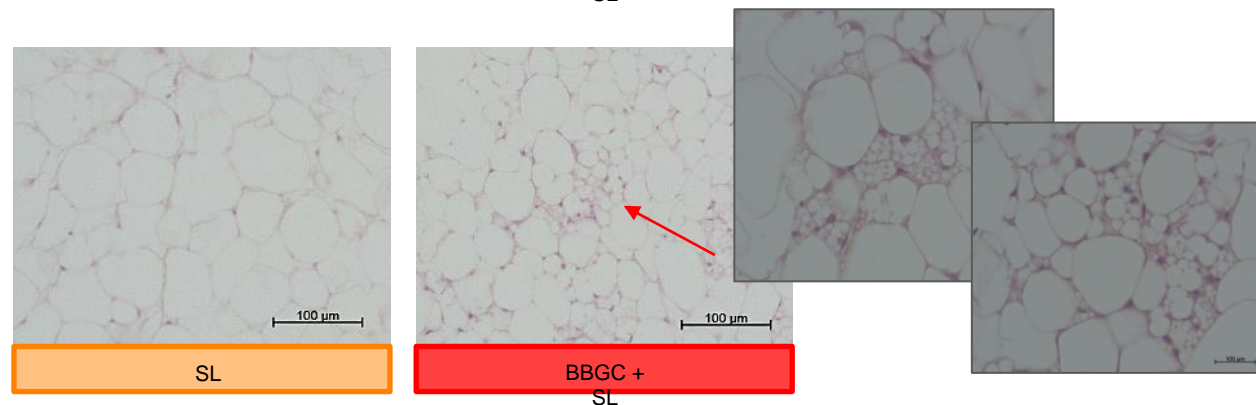

Figure S3 - Representative images of the liver and VAT stained with Haematoxylin-eosin (100 x) – liver and VAT from BBGC-offspring male SL (A and b, respectively).

Table S1 - Primary antibodies used in Western Blotting

| Antibody                     | Molecular weight (kDa) | Dilution | Manufacturer    | Secondary Antibody | Reference  |
|------------------------------|------------------------|----------|-----------------|--------------------|------------|
| Anti-AMPK $\alpha$           | $\approx 62$ kDa       | 1:1000   | Cell signaling  | Anti-Rabbit        | 2532       |
| Anti-p(Thr172)-AMPK $\alpha$ | $\approx 62$ kDa       | 1:1000   | Cell signaling  | Anti-Rabbit        | 2535       |
| Anti-Calnexin                | 83 kDa                 | 1:2000   | Sicgen          | Anti-Goat          | AB0037-500 |
| Anti-D1R                     | $\approx 48$ kDa       | 1:1000   | Abcam           | Anti-Rabbit        | ab81296    |
| Anti-GHSR1 $\alpha$          | $\approx 42$ kDa       | 1:500    | Abcam           | Anti-Rabbit        | ab85104    |
| Anti-Insulin R $\beta$       | $\approx 95$ kDa       | 1:1000   | Cell signaling  | Anti-Rabbit        | 3025       |
| Anti-MG-H1                   |                        | 1:1000   | HycultBiotech   | Anti-Mouse         | HM5017     |
| Anti-NPY1R                   | $\approx 52$ kDa       | 1:1000   | Bio-Rad         | Anti-Sheep         | 6732-0150  |
| Anti-NPY2R                   | $\approx 52$ kDa       | 1:1000   | Sicgen          | Anti-Goat          | AB0328-100 |
| Anti-PPAR $\alpha$           | $\approx 54$ kDa       | 1:1000   | Abcam           | Anti-Rabbit        | ab227074   |
| Anti-PPAR $\gamma$           | $\approx 54$ kDa       | 1:1000   | Cell Signalling | Anti-Rabbit        | 81b8       |
